# Supplementary material for: Antioxidant and Antibacterial Effects of Potential Probiotics Isolated from Korean Fermented Foods
Source: MDPI journal article supplement (doi:10.3390/ijms231710062), 2022-09-02
Supplement: s1 [file s1]

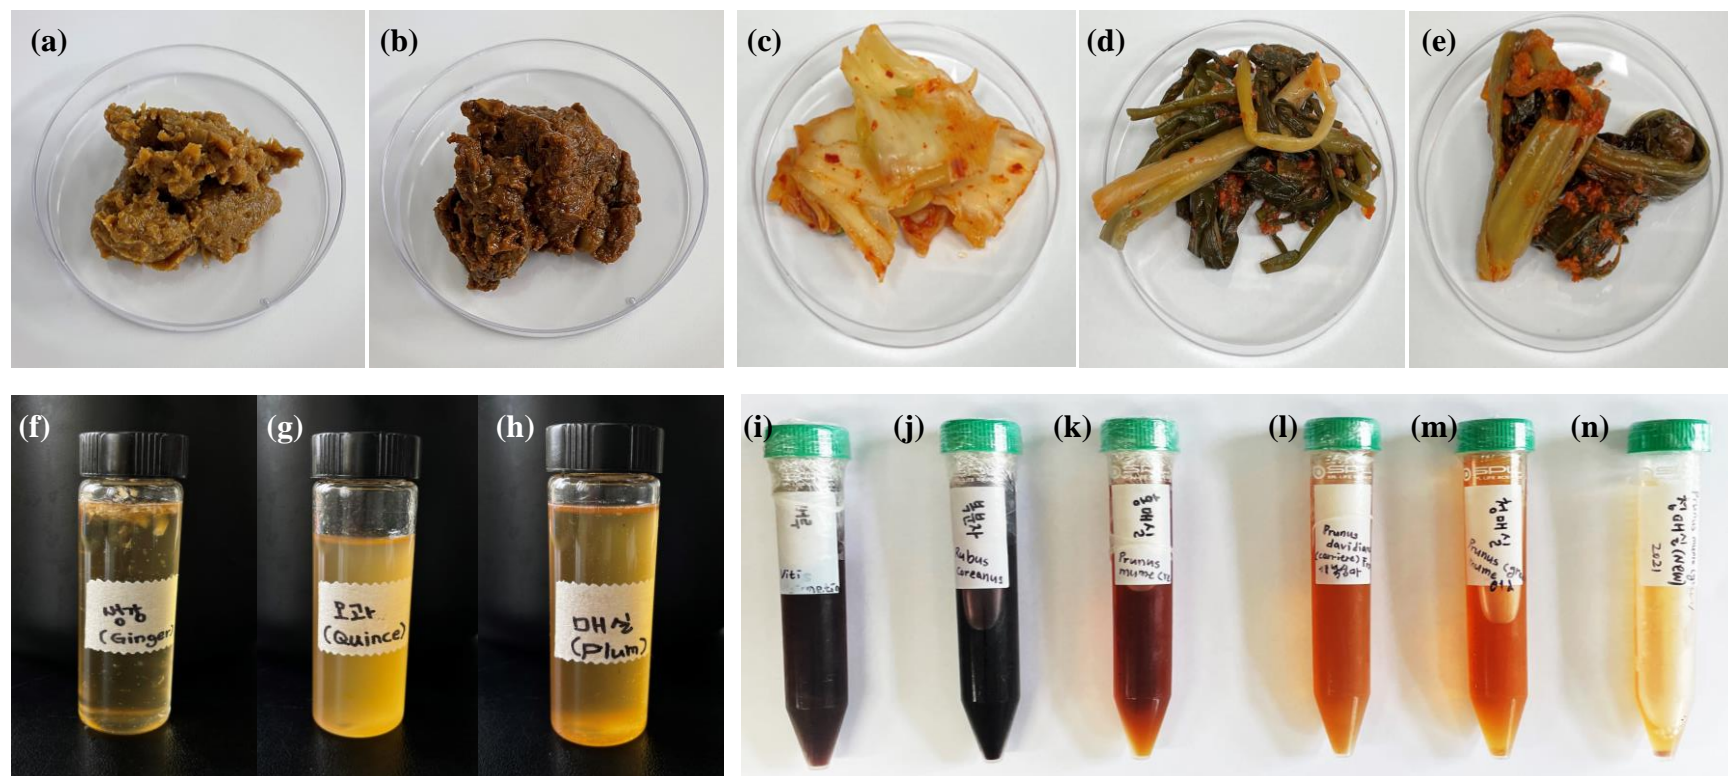

**Figure S1.** Fermented Korean food samples used for probiotics isolation. Home made soybean paste (HMS) – a; commercial Soybean paste (CS) – b; cabbage kimchi (CAK) – c; green onion kimchi (GOK) – d; leaf mustard kimchi (LMK) – e; ginger (*Zingiber officinale*) juice – f; quince (*Cydonia oblonga*) fruit juice – g; plum (*Prunus domestica*) fruit juice – h; crimson glory vine (*Vitis coignetiae*) fruit juice – i; Korean bramble (*Rubus coreanus*) fruit juice – j; Japanese apricot (*Prunus mume*) red fruit juice – k; David's peach (*Prunus davidiana*) fruit juice – l; *Prunus mume* green fruit juice (old) – m; *Prunus mume* green fruit juice (fresh) – n.

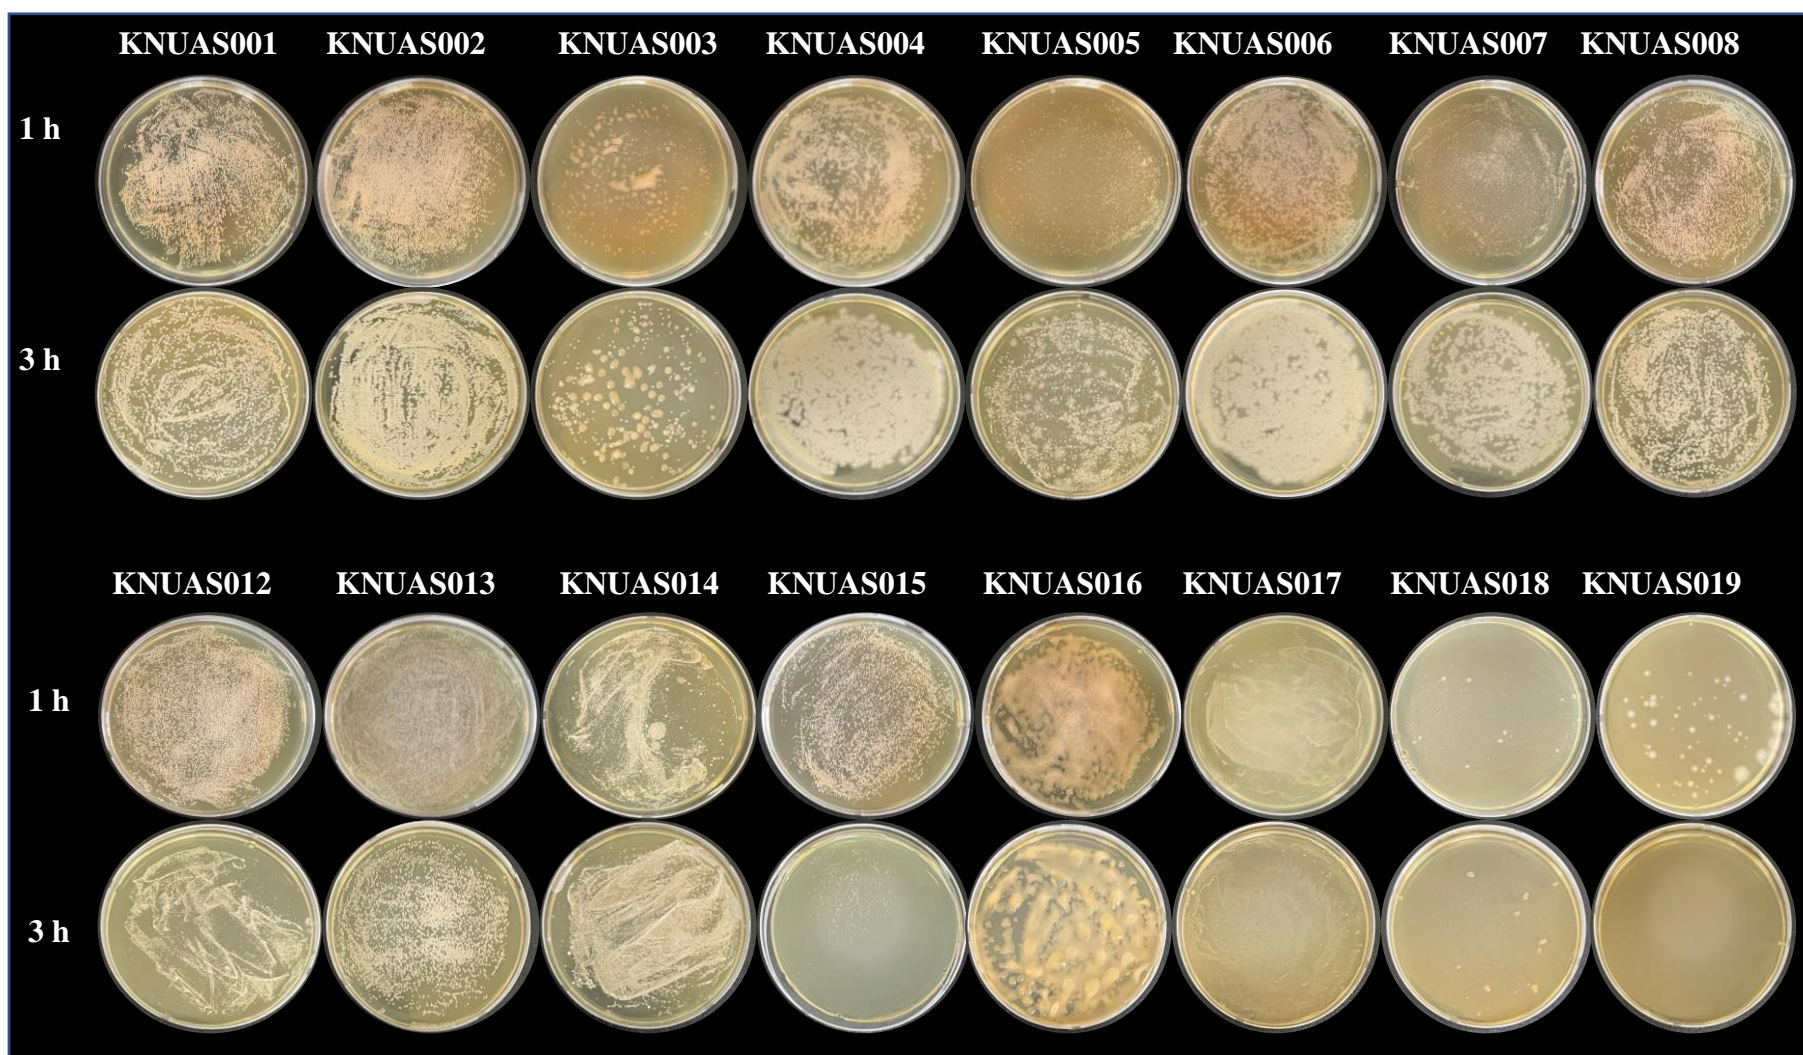

**Figure S2.** Simulated gastric juice environment tolerance of isolated bacterial strains from fermented Korean foods. Cell viability of bacterial strains on simulated gastric juice environment at 1 h and 3 h.



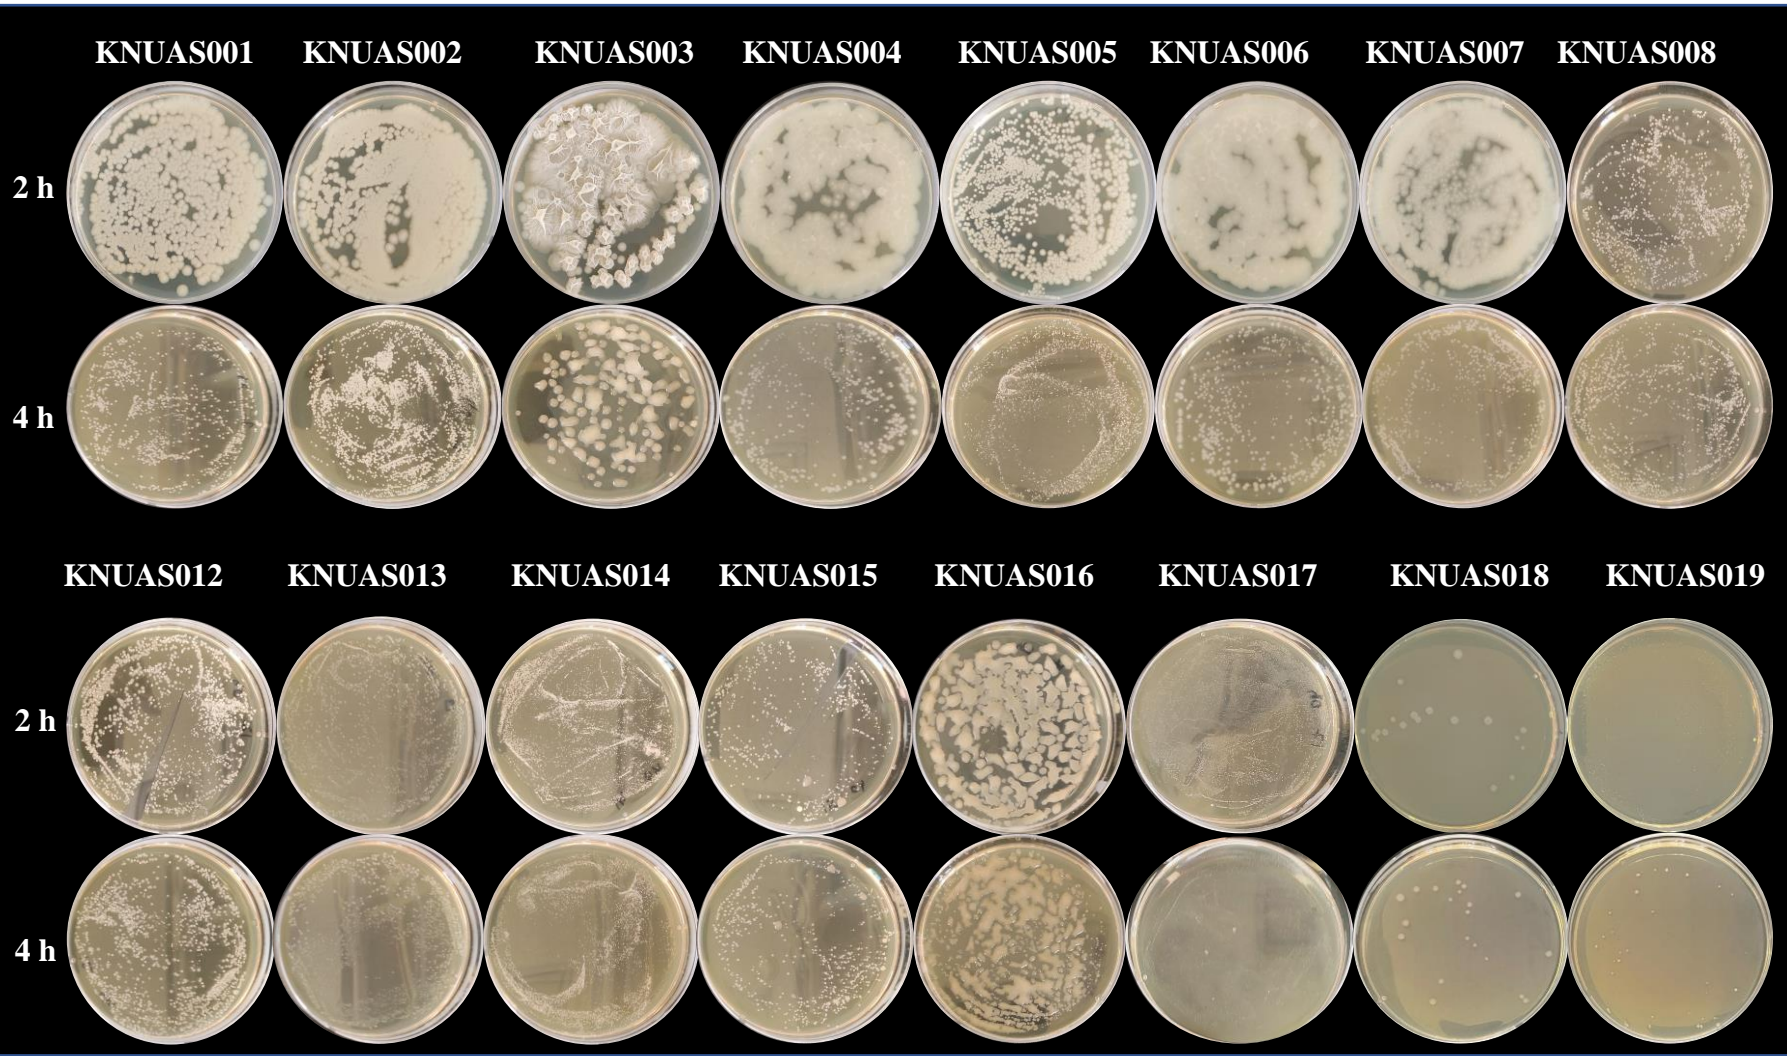

**Figure S3.** Bile salts environment tolerance of isolated bacterial strains from fermented Korean foods. Cell viability of bacterial strains on simulated gastric juice environment at 2 h and 4 h.

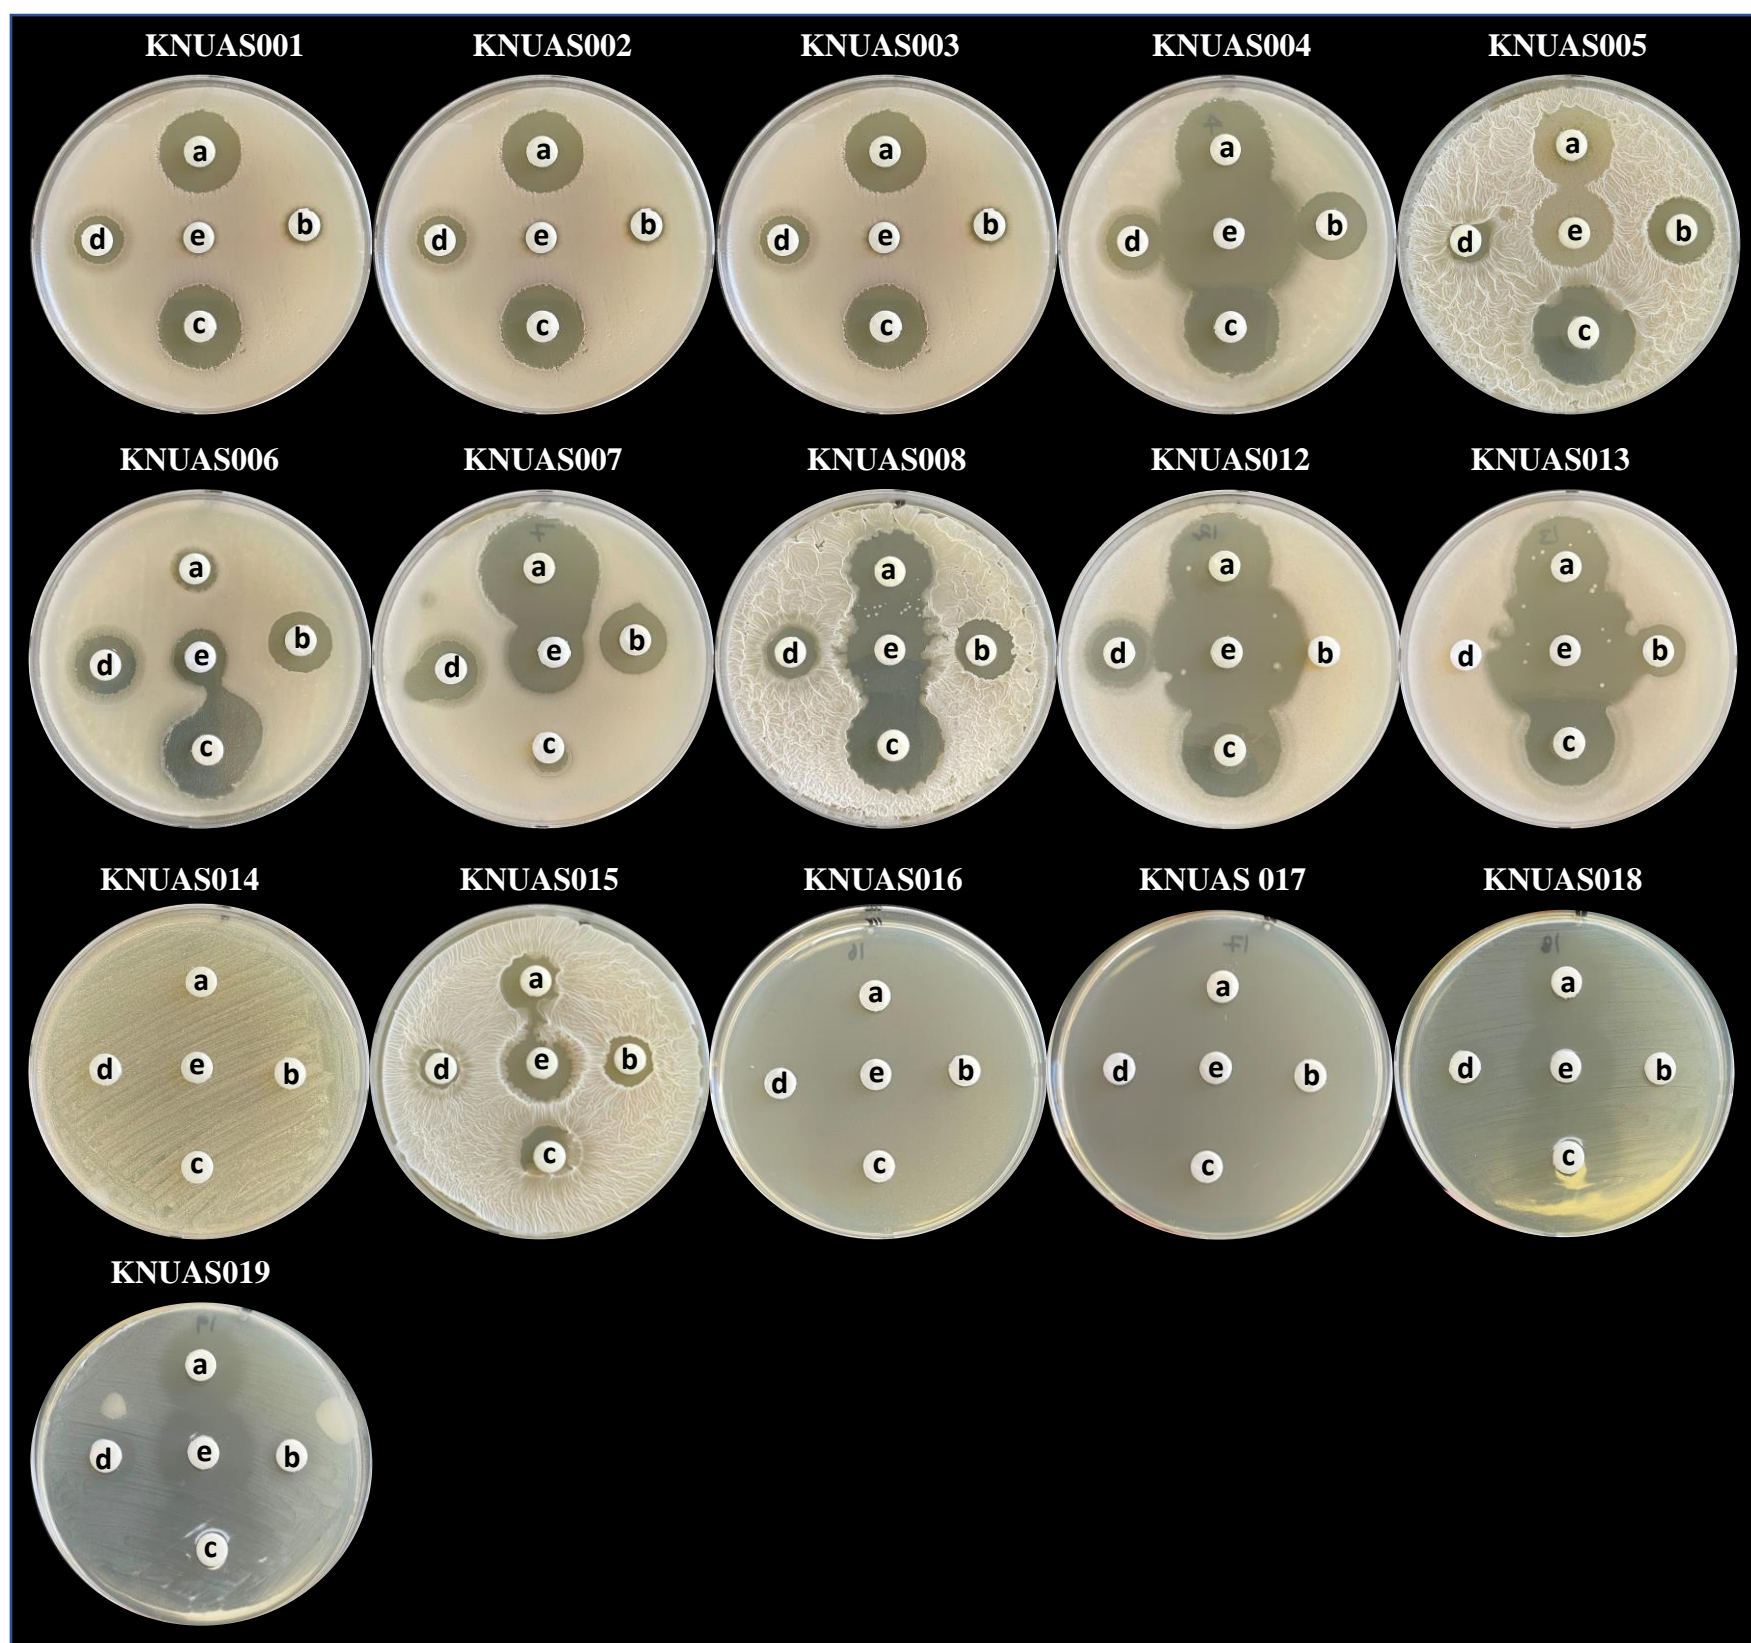

**Figure S4.** Antibiotic susceptibility of isolated bacterial strains. Tetracycline hydrochloride (TCH, 30  $\mu\text{g}$ ) – a; vancomycin hydrochloride (VAN, 30  $\mu\text{g}$ ) – b; erythromycin (ERY, 15  $\mu\text{g}$ ) – c; gentamicin sulfate (GEN, 10  $\mu\text{g}$ ) – d; ampicillin sodium salt (AMP, 10  $\mu\text{g}$ ) – e.
